# Supplementary material for: Comparison laboratory data between children with Kawasaki Disease and COVID-19
Source: Research Square preprint supplement (doi:10.21203/rs.3.rs-266709/v2), 2021-04-26
Supplement: Supplementary file 1 [file 5a4cc7150edc4906875ad184.docx]

Table 1: Comparison laboratory between children with COVID-19 and Kawasaki Disease

|  | COVID-19（N=24） | Kawasaki disease（N=234） | Univariate  P value | Multivariate  P value | Multivariate (B) | odds ratio | 95% Confidence interval | |
| --- | --- | --- | --- | --- | --- | --- | --- | --- |
| Lower | Upper |
| Age (month) | 54 (16, 105) | 20 (12, 35.5) | 0.290 | 0.012 | -1.965 | 0.140 | 0.030 | 0.651 |
| Male gender (%) | 12 (50%) | 143 (61.1%) | 0.290 | - |  |  |  |  |
| white blood cell count (*10^9/L) | 6.59 (3.87, 9.57) | 14.25 (10.11, 17.52) | <0.001 | 0.025 | 1.858 | 6.409 | 1.267 | 32.415 |
| Neutrophil % | 47.51 (28.59, 58.8) | 60.71 (49.62, 74.29) | <0.001 | - |  |  |  |  |
| Lymphocyte % | 35.31 (20.5, 50.88) | 26.88 (16.99, 38.93) | 0.012 | - |  |  |  |  |
| Platelet (*10^9/L) | 207 (156.75, 301.25) | 353.5 (278.75, 449.5) | <0.001 | 0.03 | 1.728 | 5.627 | 1.178 | 26.886 |
| Hemoglobin (g/L) | 122 (113, 134.75) | 108.5 (100, 115) | <0.001 | - |  |  |  |  |
| C-reactive Protein (mg/L) | 10.85 (5.82, 30) | 65.59 (33.34, 115.55) | <0.001 | - |  |  |  |  |
| Procalcitonin (ng/L) | 0.07 (0.048, 0.095) | 0.44 (0.16, 1.33) | <0.001 | 0.001 | 2.890 | 17.985 | 3.219 | 100.493 |
| AST (U/L) | 31.5 (20.35, 40) | 35.99 (29.0, 51.75) | 0.019 | 0.009 | 3.150 | 23.333 | 2.166 | 251.365 |
| ALT (U/L) | 18.5 (13.7, 42.25) | 20.2 (13.45, 44.63) | 0.513 | - |  |  |  |  |

Data were present as medium with (quartile, Q1, Q3)

AST: Aspartate Aminotransferase

ALT: Alanine Aminotransferase

Multivariate (B): Coefficients of variables in Multivariate analysis. OR odds ratio, CI confidence interval

Male gender was analyzed by Pearson Chi-square test and others were analyzed by Mann-Whitney *U* test.
